# Supplementary material
Source: PubMed Central journal article supplement (PMC3102784)
Supplement: NIHMS279971-supplement-1.pdf [file NIHMS279971-supplement-1.pdf]

# **Neuronal activity regulates the regional vulnerability to amyloid- $\beta$ deposition**

Adam W. Bero, Ping Yan, Jee Hoon Roh, John R. Cirrito, Floy R. Stewart, Marcus E. Raichle,  
Jin-Moo Lee and David M. Holtzman

Supplemental Information:  
Supplementary Figures 1–5

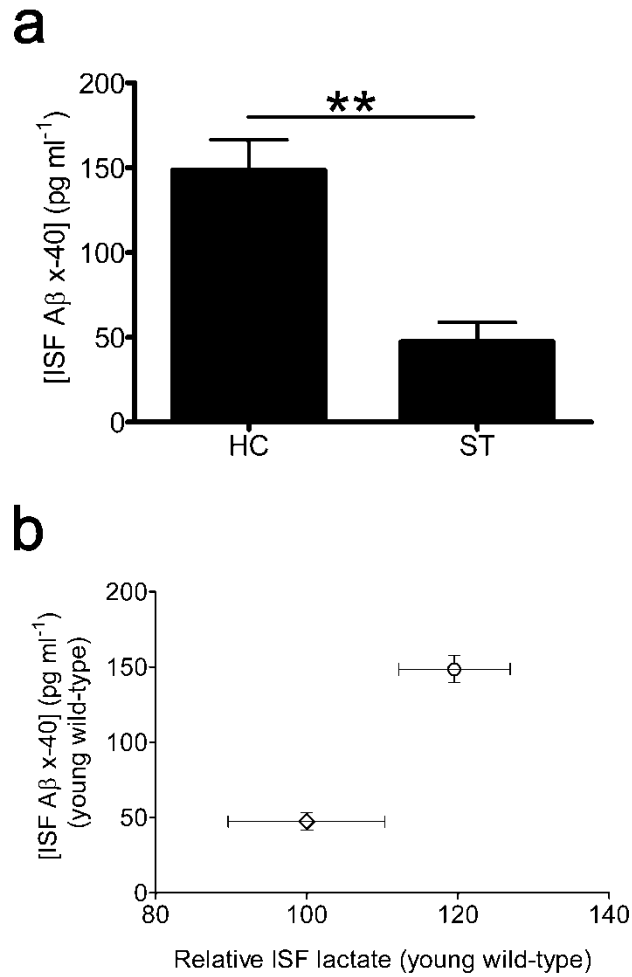

**Supplementary Figure 1** Regional ISF A $\beta$  and lactate levels in wild-type (B6SJL) mice. **(a)** In vivo microdialysis was performed in hippocampus and striatum of  $5.5 \pm 0.5$  month-old wild-type (B6SJL) mice. Murine ISF A $\beta_{x-40}$  levels were significantly greater in hippocampus compared to striatum ( $n = 4$  per group; two-tailed t-test). **(b)** Murine ISF A $\beta_{x-40}$  levels were closely associated with ISF lactate levels in a region-specific manner ( $n = 4$ ). ◇, striatum; ○, hippocampus. \*\*,  $P < 0.01$ . Values represent mean  $\pm$  SEM.

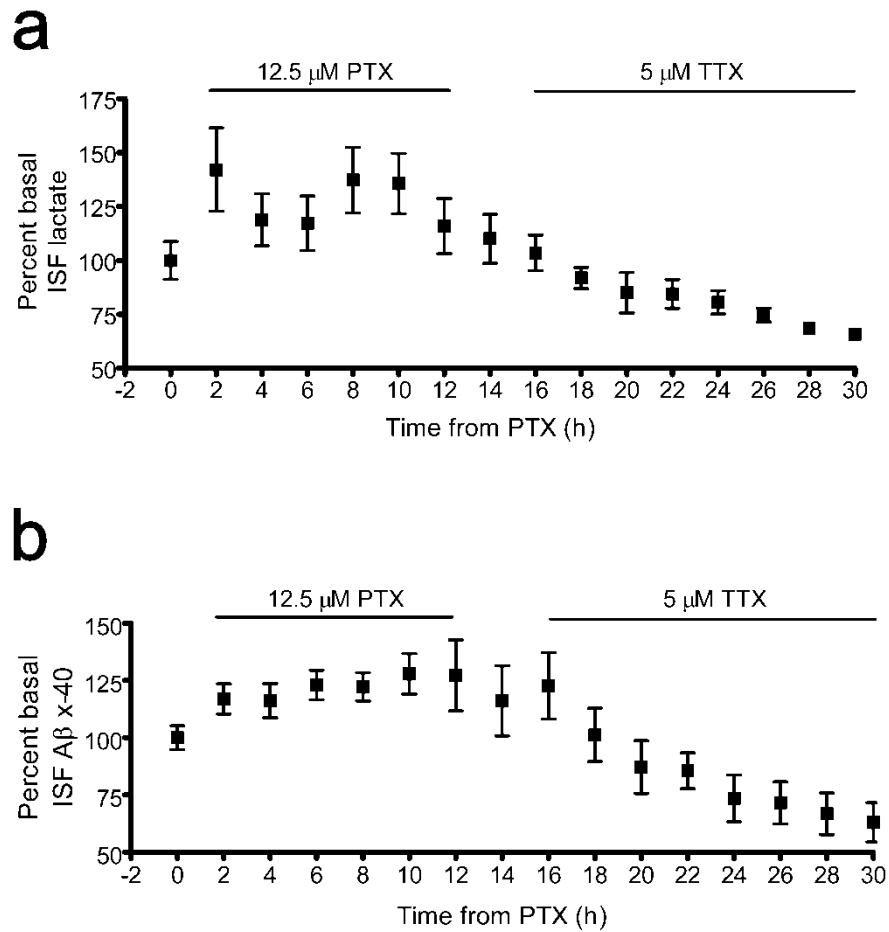

**Supplementary Figure 2** Time course of picrotoxin and tetrodotoxin treatment on ISF A $\beta_{x-40}$  and lactate levels in hippocampus. **(a,b)** Young ( $3.5 \pm 0.5$  month-old) Tg2576 mice were treated sequentially with picrotoxin ( $12.5 \mu\text{M}$ ; PTX) and tetrodotoxin ( $5 \mu\text{M}$ ; TTX) via reverse microdialysis during the microdialysis sampling period. **(a)** ISF lactate and **(b)** A $\beta_{x-40}$  levels were increased during PTX treatment and decreased during TTX treatment ( $n = 4$  per group). Values represent mean  $\pm$  SEM.

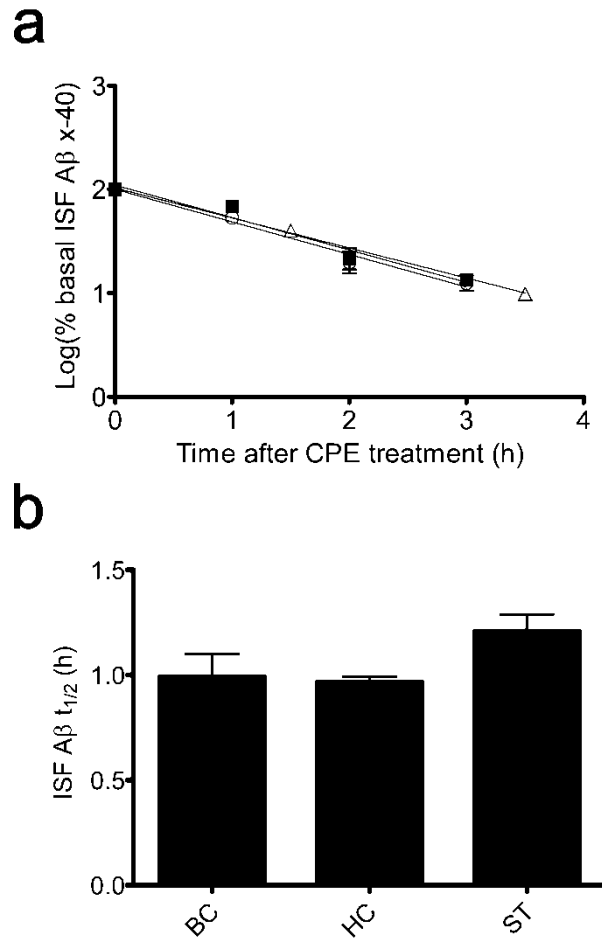

**Supplementary Figure 3** ISF Aβ<sub>x-40</sub> clearance rates across brain regions of young Tg2576 mouse brain.

(a,b) After baseline ISF Aβ<sub>x-40</sub> levels were established, young (3.5 ± 0.5 month-old) Tg2576 mice were treated with a potent γ-secretase inhibitor, Compound E (CPE; 10 mg kg<sup>-1</sup>), during the microdialysis sampling period to halt Aβ synthesis and permit ISF Aβ<sub>x-40</sub> t<sub>1/2</sub> determination. ISF Aβ<sub>x-40</sub> t<sub>1/2</sub> did not differ across barrel cortex (BC), hippocampus (HC) and striatum (ST; *n* = 4 per group; one-way ANOVA, Tukey's post hoc test for multiple comparisons). ○, barrel cortex; ■, hippocampus; △, striatum. Values represent mean ± SEM.

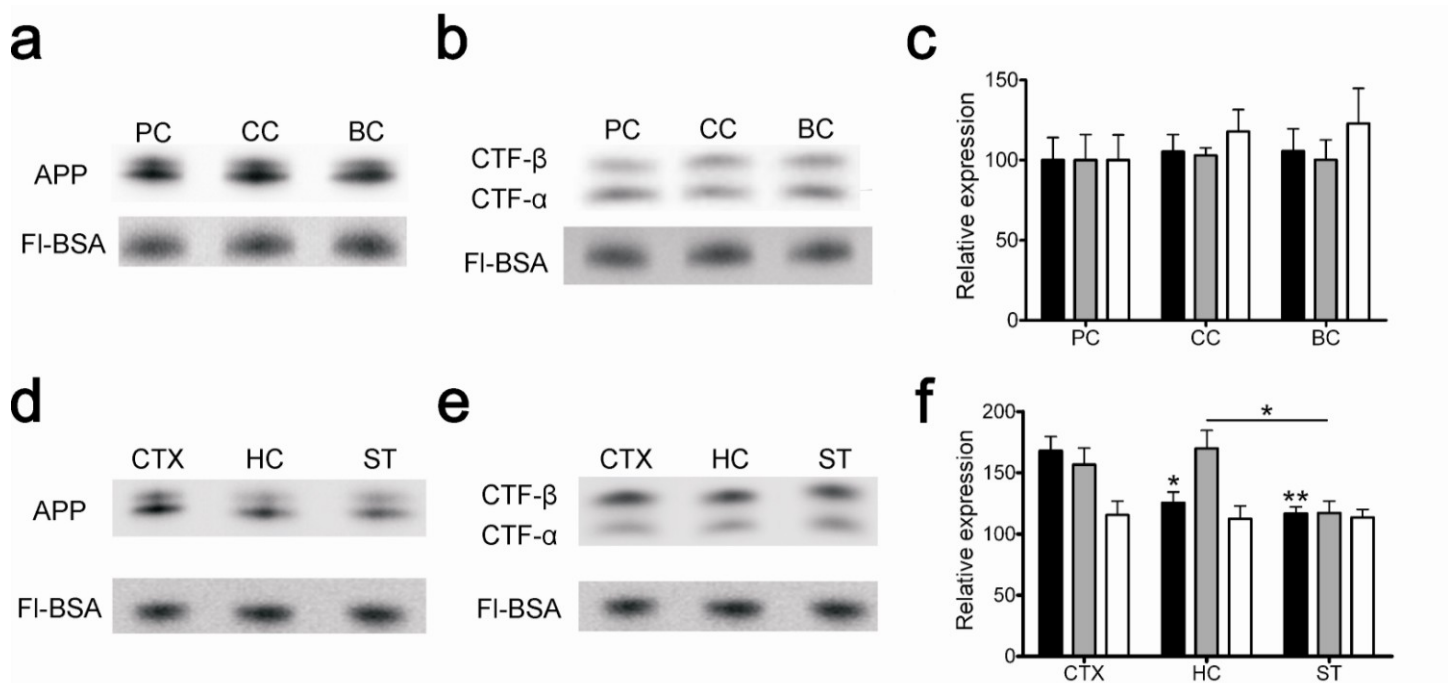

**Supplementary Figure 4** APP expression and processing are not associated with regional ISF A $\beta$  levels or plaque deposition. (a–c) Piriform (PC), cingulate (CC) and barrel (BC) cortices were dissected from fresh brain sections (500  $\mu$ m thick) of young (3.5  $\pm$  0.5 month-old) Tg2576 mice. Dissected tissue samples were analyzed for expression of (a) full-length APP, (b) CTF- $\beta$  and CTF- $\alpha$  by western blot analysis. APP and CTF expression in each lane was normalized to fluorescein-conjugated bovine serum albumin (FI-BSA) loading control. (c) Expression of APP, CTF- $\beta$  and CTF- $\alpha$  did not differ across piriform, cingulate and barrel cortices ( $n = 6$  per group; one-way ANOVA, Tukey's post hoc test for multiple comparisons). (d–f) Whole cortex (CTX), hippocampus (HC) and striatum (ST) were dissected from fresh brain tissue of young (3.5  $\pm$  0.5 month-old) Tg2576 mice. Dissected tissue samples were analyzed for expression of (d) full-length APP, (e) CTF- $\beta$  and CTF- $\alpha$  by western blot analysis. APP and CTF expression in each lane was normalized to FI-BSA loading control. (f) Expression of full-length APP was significantly greater in cortex compared to hippocampus and striatum. CTF- $\beta$  expression was greater in hippocampus compared to striatum. CTF- $\alpha$  expression did not differ significantly across brain regions ( $n = 7$  per group; one-way ANOVA, Tukey's post hoc test for multiple comparisons). ■, full-length APP; ▒, CTF- $\beta$ ; □, CTF- $\alpha$ . \*,  $P < 0.05$ ; \*\*,  $P < 0.01$ . Panels a,b,d,e contain cropped blots. Values represent mean  $\pm$  SEM.

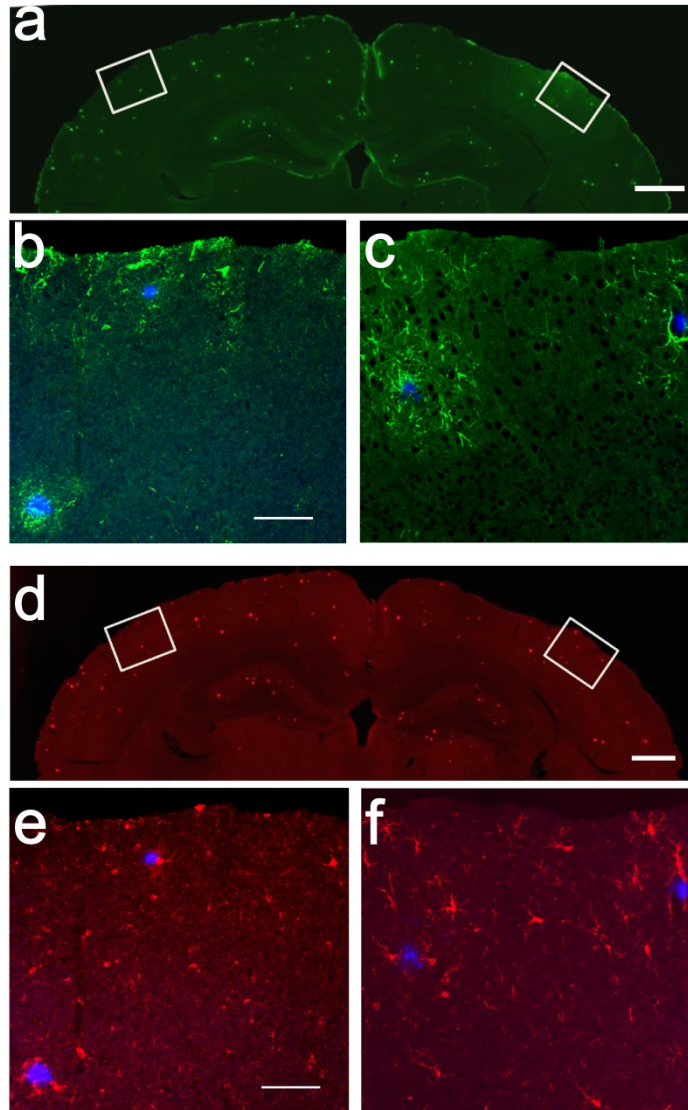

**Supplementary Figure 5** Glial activation in barrel cortex following long-term vibrissae deprivation. (a) Low-power image of a representative brain section from an APP/PS1 (7–7.5 months old) mouse that underwent 28-day unilateral vibrissae deprivation stained with an anti-GFAP antibody to visualize astrocytes (green) and counter-stained with X-34 to visualize amyloid plaque deposition (blue). No clear difference in GFAP staining was evident between vibrissae-deprived (left; b) and control (right; c) hemispheres ( $n = 6$ ). (d) Low-power image of a representative brain section from an APP/PS1 (7–7.5 months old) mouse that underwent 28 day unilateral vibrissae deprivation stained with an anti-Iba-1 antibody to visualize microglia (red) and counter-stained with X-34 to visualize amyloid plaque deposition (blue). No clear difference in Iba-1 staining was present between vibrissae-deprived (left; e) and control (right; f) hemispheres ( $n = 6$ ). White rectangles in a,d denote barrel cortex. Scale bars in a,d, 1 mm; scale bars in b,e, 50  $\mu$ M.
